# Supplementary material for: Facile electrolysis-solvothermal synthesis of NiOx/graphene for enhanced ethanol oxidation to acetate
Source: Royal Society of Chemistry journal article supplement (doi:10.1039/d3dt03963c), 2024-01-01
Supplement: d3dt03963c1.pdf [file d3dt03963c1.pdf]

## Facile electrolysis-solvothermal synthesis of NiO<sub>x</sub>/graphene for enhanced ethanol oxidation to acetate

Man Zhao<sup>‡</sup>, Xuemin Yang<sup>‡</sup>, Zimei Fu, Wenxiang Wang, Wei Wen, He Xiao\*, Li Zhang, Junming Zhang, Baoliang Lv, Jianfeng Jia\*

*Key Laboratory of Magnetic Molecules & Magnetic Information Materials Ministry of Education, The School of Chemical and Material Science, Shanxi Normal University, Taiyuan 030000, China.*

*\*Corresponding author*

*E-mail: xiaoh200808 @sxnu.edu.cn; jiajf@dns.sxnu.edu.cn;*

<sup>‡</sup> These authors contributed equally to this work.

### **Experimental section**

#### **Chemicals and materials**

Nickel wire was bought from Runde Metal Material Company (China). Graphite powder (80 mesh) was bought from Qingdao Graphite Company. Tetrabutylammonium tetrafluoroborate (TBABF<sub>4</sub>, 98%) and propylene carbonate (PC, 99.9%) were purchased from Aladdin.

#### **Preparation of NiO<sub>x</sub>/G**

The NiO<sub>x</sub>/G was prepared by a two electrode electrolysis-solvothermal method. 40 mg graphite was put in a plastic tube with Pt plate inserted and used as cathode. Polished Ni wire was served as anode. The two electrodes were immersed in PC solvent containing 0.6 M TBA BF<sub>4</sub>. The working voltage was set at 30 V for 2 h, 4 h and 6 h respectively. Subsequently, the exfoliated graphene was collected from the cathode and mixed with the electrolyte solvent. This mixed solution was finally transferred to an 80 mL Teflon-lined container. Under Ar atmosphere, the resultant suspension was stirred (500 rpm) and treated at 160 °C for 12 h. Finally, the solution was filtered. As-obtained product was washed with PC solution twice and ethanol twice, and dried at 60 °C for 8 h. the same method was applied for the synthesis of NiO<sub>x</sub>, except that exfoliated graphene was excluded from the electrolyte solvent.

## Characterization

X-ray diffraction (XRD) analysis was used to analysis the crystalline of as-prepared samples on an X-ray diffractometer (Ultima IV-185) with Cu Ka radiation. X-ray photoelectron spectroscopy (XPS) was operated to detect the chemical compositions of the materials on Thermo Fisher SCIENTIFIC using Al Ka X-ray source. Transmission electron microscopy (TEM, FEI Tecnai F20) and scanning electron microscopy (SEM, JSM-7001F) were used to study the morphologies of the samples.

## Electrochemical tests

Electrochemical studies of NiO<sub>x</sub>/G were carried out in 1 M KOH solution with 1 M ethanol by a CHI Instruments 760 E electrochemical workstation using a standard three-electrode setup. A graphite rod, a catalyst-coated glassy carbon electrode (GCE, 3mm), and Hg/HgO (dipped in 1M KOH) were used as the counter, working, and reference electrodes, respectively. The catalyst ink was prepared by dispersing 5.0 mg of catalyst into 0.75 ml of anhydrous ethanol and 0.25 ml of ultrapure water with 0.03 ml of Nafion solution (5 wt%), then treated with ultra-sonication for 30 min. 5 µl such ink was dip coated on glassy carbon electrode and dried for several hours. The electrocatalytic activity for EOR was investigated by cyclic voltammograms (CVs) with a scan rate of 50 mV/s. All electrochemical measurement was performed at room temperature. All potentials were converted to reversible hydrogen electrode (RHE) according to the following equation:

$$E(\text{RHE}) = E(\text{Hg}/\text{HgO}) + 0.0591 \cdot \text{pH} + 0.098$$

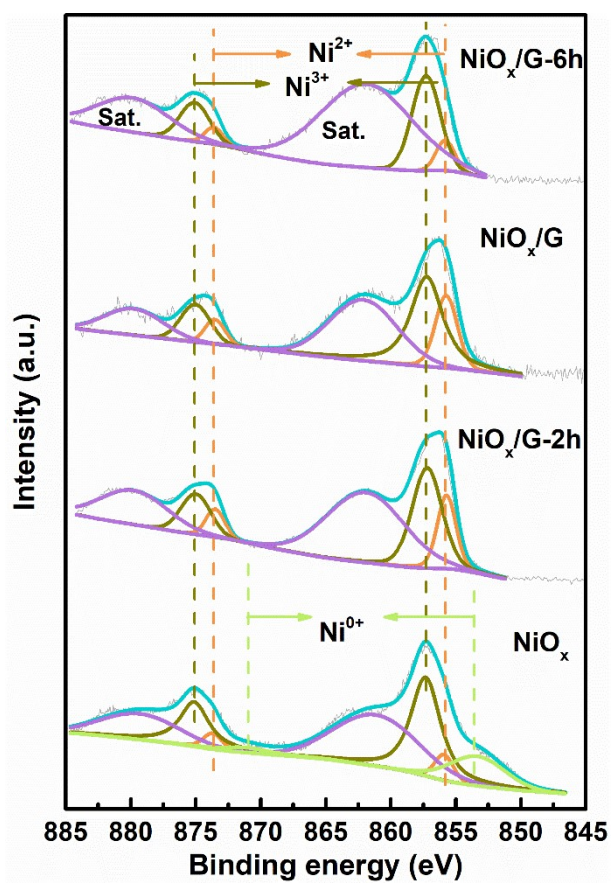

Fig. S1 XPS Ni 2p spectra for NiO<sub>x</sub>, NiO<sub>x</sub>/G, NiO<sub>x</sub>/G-2h and NiO<sub>x</sub>/G-6h.

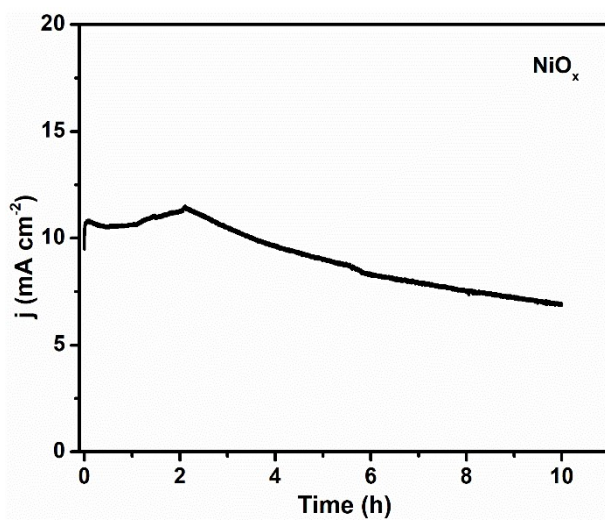

Fig. S2 chronoamperometry curve of NiO<sub>x</sub>

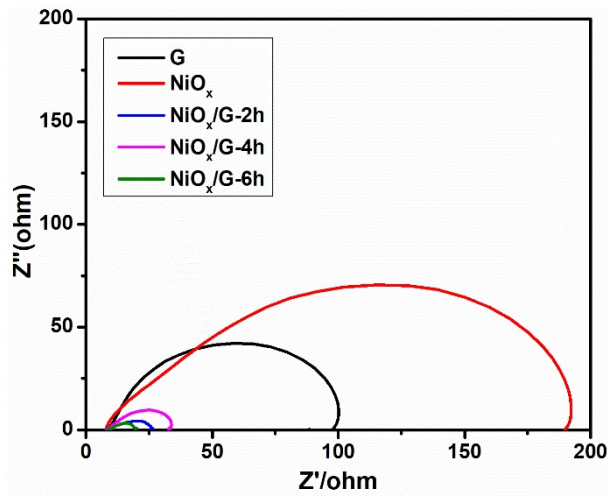

Fig.S3 EIS spectra for NiO<sub>x</sub>/G electrolyzed for different time, NiO<sub>x</sub> and G.

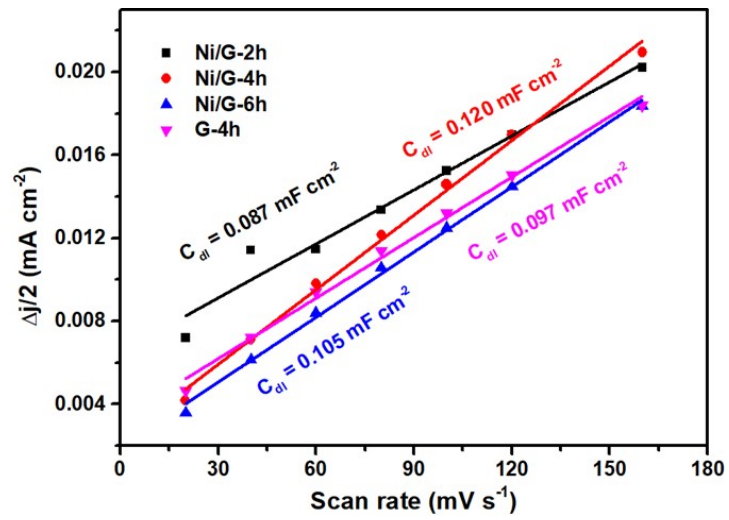

Fig. S4  $C_{dl}$  values of catalysts derived from CV curves in non-faradaic region

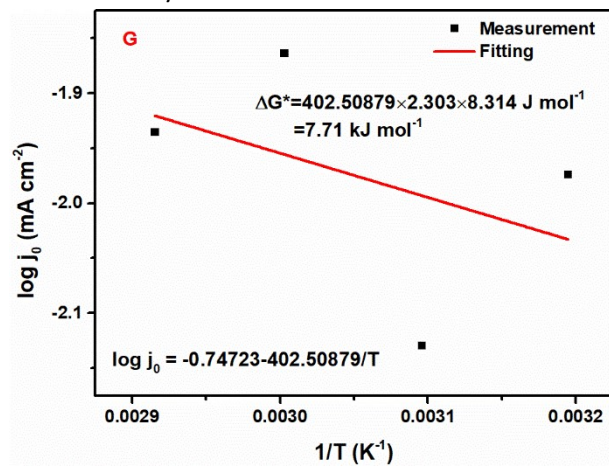

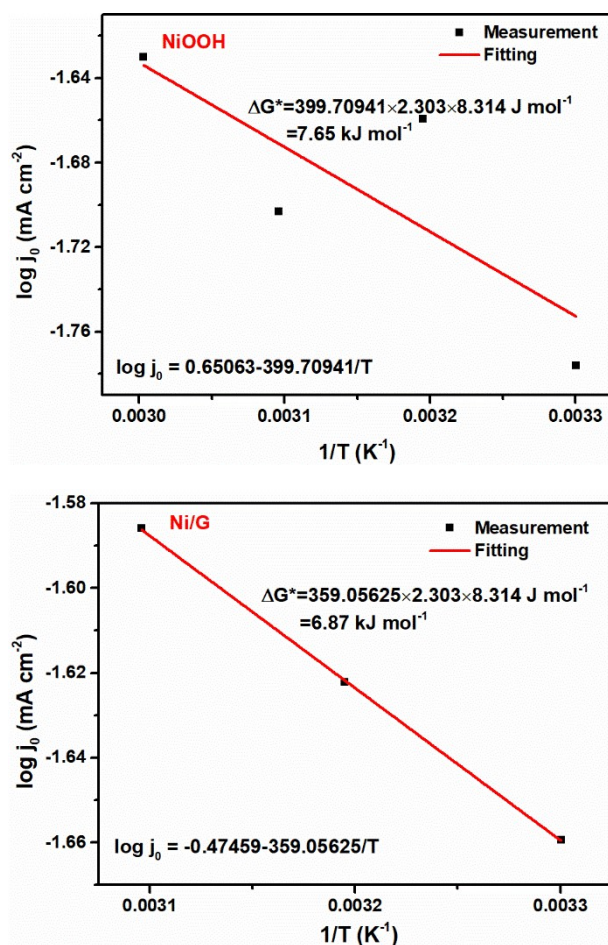

Fig. S5 Arrhenius curves of catalysts derived from LSV curves at various temperatures.

Table S1. Calculated Ni<sup>3+</sup> ratio for all catalysts based on XPS spectra.

| catalysts                                               | NiO <sub>x</sub> | NiO <sub>x</sub> /G-2h | NiO <sub>x</sub> /G | NiO <sub>x</sub> /G-6h |
|---------------------------------------------------------|------------------|------------------------|---------------------|------------------------|
| Ni <sup>3+</sup> /(Ni <sup>2+</sup> +Ni <sup>3+</sup> ) | 0.87             | 0.68                   | 0.70                | 0.81                   |

Table S2 Summary of the ethanol oxidation activities on Ni-based catalysts

| Catalyst            | Onset potential (V vs.RHE) | Peak current density (mA cm <sup>-2</sup> ) | Electrolyte          | References |
|---------------------|----------------------------|---------------------------------------------|----------------------|------------|
| NiO <sub>x</sub> /G | 1.34                       | 296.5                                       | 1M Ethanol<br>1M KOH | This work  |
| NiO@C/CC            |                            | 119.1                                       | 1M Ethanol<br>1M KOH | 1          |

|                                                          |                    |                |                           |    |
|----------------------------------------------------------|--------------------|----------------|---------------------------|----|
| Ni <sub>3</sub> S <sub>2</sub> NW                        | 1.31               | Around 225     | 1M Ethanol<br>1M KOH      | 2  |
| Ni/aHC                                                   | 1.47               | 17.64          | 1M Ethanol<br>1M NaOH     | 3  |
| Cu,Ni,Fe <sub>2</sub> O <sub>3</sub> /<br>GCE            | 0.3 V<br>vs.Hg/HgO | 101            | 1 M Ethanol<br>0.5 M NaOH | 4  |
| Ni/RGO                                                   | 1.39               | 12             | 3M Ethanol<br>1M KOH      | 5  |
| Cu-doped<br>NiOOH                                        |                    | 227            | 1M Ethanol<br>1M KOH      | 6  |
| β-Ni(OH) <sub>2</sub>                                    | 1.29               | 13 (300 on NF) | 0.5M Ethanol<br>1M KOH    | 7  |
| Ni <sub>0.75</sub> Co <sub>0.25</sub><br>Se <sub>2</sub> | About 1.3          | About 90       | 1M Ethanol<br>1M KOH      | 8  |
| Ni(OH) <sub>2</sub> NS                                   | 1.4                | 163            | 1M Ethanol<br>1M KOH      | 9  |
| Ni <sub>0.9</sub> Co <sub>0.1</sub>                      | 1.42               | 142            | 1M Ethanol<br>3M KOH      | 10 |

## Reference

- 1 C. Liu, W. Zhou, J. Zhang, Z. Chen, S. Liu, Y. Zhang, J. Yang, L. Xu, W. Hu, Y. Chen and Y. Deng, *Adv. Energy Mater.*, 2020, **10**, 1–8.
- 2 Y. Zhang, W. Zhu, J. Fang, Z. Xu, Y. Xue, D. Liu, R. Sui, Q. Lv, X. Liu, Y. Wang, W. Chen and Z. Zhuang, *Nano Res.*, 2022, **15**, 2987–2993.
- 3 A. Cuña, C. Reyes Plascencia, E. L. da Silva, J. Marcuzzo, S. Khan, N. Tancredi, M. R. Baldan and C. de Fraga Malfatti, *Appl. Catal. B Environ.*, 2017, **202**, 95–103.
- 4 M. Ghalkhani, R. Abdullah Mirzaie, A. Banimostafa, E. Sohoulil and E. Hashemi, *Int. J. Hydrogen Energy*, 2023, **48**, 21214–21223.
- 5 X. Li, S. Ning, X. Liu, E. Shangguan, C. Wu, J. Li, Z. Wang and Q. Li, *Ionics (Kiel)*, 2019, **25**, 3775–3786.
- 6 H. Wang, A. Guan, J. Zhang, Y. Mi, S. Li, T. Yuan, C. Jing, L. Zhang, L. Zhang and G. Zheng, *Chinese J. Catal.*, 2022, **43**, 1478–1484.
- 7 W. Chen, C. Xie, Y. Wang, Y. Zou, C. L. Dong, Y. C. Huang, Z. Xiao, Z. Wei, S. Du, C. Chen, B. Zhou, J. Ma and S. Wang, *Chem*, 2020, **6**, 2974–2993.
- 8 J. Li, X. Wang, C. Xing, L. Li, S. Mu, X. Han, R. He, Z. Liang, P. Martinez, Y. Yi, Q. Wu, H. Pan, J. Arbiol, C. Cui, Y. Zhang and A. Cabot, *Chem. Eng. J.*, 2022, **440**, 135817.
- 9 Z. Zhang, Y. Dong, C. Carlos and X. Wang, *ACS Nano*, 2023, **17**, 17180–17189.
- 10 N. A. M. Barakat, M. Motlak, A. A. Elzatahry, K. A. Khalil and E. A. M. Abdelghani, *Int. J. Hydrogen Energy*, 2014, **39**, 305–316.
